# Supplementary material
Source: publisher site journal article supplement (https://www.spandidos-publications.com/5541/downloadSupplementary)
Supplement: Supplementary file 1 [file downloadSupplementary]

## Sheet: Sheet1
Table SVII. The target mRNAs of miRNAs
Ortholog of target gene	Representative transcript	Gene name	Number of 3P-seq tags supporting UTR + 5	Link to sites in UTRs	Site counts				6mer sites	Representative miRNA	Cumulative weighted context++ score	Total context++ score	Aggregate PCT
					total	8mer	7mer-m8	7mer-A1
CD3E	ENST00000361763.4	CD3e molecule, epsilon (CD3-TCR complex)	5	Sites in UTR	3	2	1	0	1	mmu-miR-709	-1.1	-1.1	N/A
NAT16	ENST00000300303.2	N-acetyltransferase 16 (GCN5-related, putative)	5	Sites in UTR	1	1	0	0	0	mmu-miR-709	-0.97	-0.97	N/A
Ortholog of target gene	Representative transcript	Gene name	Number of 3P-seq tags supporting UTR + 5	Link to sites in UTRs	Site counts				6mer sites	Representative miRNA	Cumulative weighted context++ score	Total context++ score	Aggregate PCT
					total	8mer	7mer-m8	7mer-A1
CENPBD1	ENST00000314994.3	CENPB DNA-binding domains containing 1	212	Sites in UTR	1	1	0	0	0	mmu-miR-7032-3p	-1.13	-1.13	N/A
GRIN2B	ENST00000609686.1	glutamate receptor, ionotropic, N-methyl D-aspartate 2B	5	Sites in UTR	7	0	3	4	5	mmu-miR-7032-3p	-0.95	-0.95	N/A
ERG	ENST00000398905.1	v-ets avian erythroblastosis virus E26 oncogene homolog	184	Sites in UTR	4	1	3	0	2	mmu-miR-7032-3p	-0.95	-1	N/A
CDK11A	ENST00000378635.3	cyclin-dependent kinase 11A	5	Sites in UTR	3	0	0	3	2	mmu-miR-7032-3p	-0.91	-0.91	N/A
RPL36AL	ENST00000298289.6	ribosomal protein L36a-like	105	Sites in UTR	1	1	0	0	0	mmu-miR-7032-3p	-0.89	-0.89	N/A
GREM1	ENST00000560677.1	gremlin 1, DAN family BMP antagonist	752	Sites in UTR	5	1	1	3	3	mmu-miR-7032-3p	-0.86	-2.08	N/A
2022-12-01	ENST00000374016.1	deleted in esophageal cancer 1	5	Sites in UTR	2	1	0	1	0	mmu-miR-7032-3p	-0.8	-0.8	N/A
Ortholog of target gene	Representative transcript	Gene name	Number of 3P-seq tags supporting UTR + 5	Link to sites in UTRs	Site counts				6mer sites	Representative miRNA	Cumulative weighted context++ score	Total context++ score	Aggregate PCT
					total	8mer	7mer-m8	7mer-A1
KBTBD4	ENST00000450908.1	HCG1992246; KBTBD4 protein; Uncharacterized protein	5	Sites in UTR	2	1	1	0	0	mmu-miR-6982-5p	-1.08	-1.08	N/A
SYN1	ENST00000340666.4	synapsin I	17	Sites in UTR	4	1	1	2	2	mmu-miR-6982-5p	-0.94	-0.94	N/A
ENSG00000270466	ENST00000605106.1	Uncharacterized protein	101	Sites in UTR	2	1	0	1	0	mmu-miR-6982-5p	-0.92	-0.92	N/A
SEPT1	ENST00000321367.3	septin 1	106	Sites in UTR	2	1	0	1	0	mmu-miR-6982-5p	-0.91	-0.91	N/A
MSMP	ENST00000436428.2	microseminoprotein, prostate associated	23	Sites in UTR	1	1	0	0	0	mmu-miR-6982-5p	-0.87	-0.87	N/A
CALN1	ENST00000329008.5	calneuron 1	5	Sites in UTR	6	1	3	2	2	mmu-miR-6982-5p	-0.86	-0.86	N/A
CLDN7	ENST00000538261.3	claudin 7	29	Sites in UTR	2	1	0	1	0	mmu-miR-6982-5p	-0.83	-0.83	N/A
CDR1as	CDR1as	circular RNA CDR1as	1	Sites in UTR	1	0	0	1	0	mmu-miR-6982-5p	-0.82	-0.82	N/A
C20orf26	ENST00000377309.2	chromosome 20 open reading frame 26	5	Sites in UTR	2	1	0	1	0	mmu-miR-6982-5p	-0.81	-0.81	N/A
ZIK1	ENST00000307468.4	zinc finger protein interacting with K protein 1	64	Sites in UTR	2	1	0	1	1	mmu-miR-6982-5p	-0.8	-0.81	N/A
Ortholog of target gene	Representative transcript	Gene name	Number of 3P-seq tags supporting UTR + 5	Link to sites in UTRs	Site counts				6mer sites	Representative miRNA	Cumulative weighted context++ score	Total context++ score	Aggregate PCT
					total	8mer	7mer-m8	7mer-A1
TGM7	ENST00000452443.2	transglutaminase 7	5	Sites in UTR	7	0	7	0	0	mmu-miR-1938	-1.53	-1.53	N/A
IQSEC2	ENST00000375365.2	IQ motif and Sec7 domain 2	5	Sites in UTR	6	0	4	2	4	mmu-miR-1938	-1.4	-1.67	N/A
PER2	ENST00000254658.3	period circadian clock 2	106	Sites in UTR	3	1	1	1	3	mmu-miR-1938	-1.29	-1.29	N/A
NPLOC4	ENST00000572760.1	nuclear protein localization 4 homolog (S. cerevisiae)	1360	Sites in UTR	4	0	4	0	1	mmu-miR-1938	-1.13	-1.17	N/A
SSBP3-AS1	ENST00000361350.4	SSBP3 antisense RNA 1	5	Sites in UTR	2	1	1	0	0	mmu-miR-1938	-0.94	-0.94	N/A
SFTPB	ENST00000519937.2	surfactant protein B	5	Sites in UTR	3	1	1	1	0	mmu-miR-1938	-0.92	-0.92	N/A
RNASE13	ENST00000382951.3	ribonuclease, RNase A family, 13 (non-active)	5	Sites in UTR	3	1	0	2	1	mmu-miR-1938	-0.9	-0.9	N/A
SCN1B	ENST00000262631.5	sodium channel, voltage-gated, type I, beta subunit	72	Sites in UTR	3	0	3	0	4	mmu-miR-1938	-0.9	-0.9	N/A
KCNJ6	ENST00000609713.1	potassium inwardly-rectifying channel, subfamily J, member 6	5	Sites in UTR	5	0	1	4	5	mmu-miR-1938	-0.9	-0.9	N/A
DNAL4	ENST00000216068.4	dynein, axonemal, light chain 4	9	Sites in UTR	3	1	1	1	0	mmu-miR-1938	-0.88	-0.88	N/A
RP11-1055B8.7	ENST00000307745.7	BAH and coiled-coil domain-containing protein 1	247	Sites in UTR	5	3	0	2	3	mmu-miR-1938	-0.87	-0.87	N/A
WFDC5	ENST00000372789.4	WAP four-disulfide core domain 5	5	Sites in UTR	2	1	1	0	1	mmu-miR-1938	-0.87	-0.87	N/A
C1orf220	ENST00000319387.2	chromosome 1 open reading frame 220	5	Sites in UTR	1	1	0	0	1	mmu-miR-1938	-0.86	-0.86	N/A
C12orf73	ENST00000547975.1	chromosome 12 open reading frame 73	1060	Sites in UTR	1	1	0	0	0	mmu-miR-1938	-0.85	-0.94	N/A
RP11-176H8.1	ENST00000547378.1	Uncharacterized protein	48	Sites in UTR	1	1	0	0	0	mmu-miR-1938	-0.84	-0.84	N/A
PRR13	ENST00000549068.1	proline rich 13	387	Sites in UTR	1	1	0	0	0	mmu-miR-1938	-0.83	-0.85	N/A
KIAA1671	ENST00000401395.1	KIAA1671	549	Sites in UTR	4	1	2	1	3	mmu-miR-1938	-0.83	-0.84	N/A
TOP3B	ENST00000413067.2	topoisomerase (DNA) III beta	5	Sites in UTR	3	0	0	3	0	mmu-miR-1938	-0.81	-0.81	N/A
ALPK3	ENST00000258888.5	alpha-kinase 3	16	Sites in UTR	3	0	2	1	2	mmu-miR-1938	-0.8	-0.8	N/A
Ortholog of target gene	Representative transcript	Gene name	Number of 3P-seq tags supporting UTR + 5	Link to sites in UTRs	Site counts				6mer sites	Representative miRNA	Cumulative weighted context++ score	Total context++ score	Aggregate PCT
					total	8mer	7mer-m8	7mer-A1
POU3F3	ENST00000361360.2	POU class 3 homeobox 3	461	Sites in UTR	5	0	5	0	2	mmu-miR-3960	-2.91	-2.92	N/A
EVX1	ENST00000222761.3	even-skipped homeobox 1	7	Sites in UTR	6	0	6	0	1	mmu-miR-3960	-2	-2	N/A
MARVELD1	ENST00000285605.6	MARVEL domain containing 1	2470	Sites in UTR	3	1	2	0	0	mmu-miR-3960	-1.21	-1.21	N/A
NKX2-5	ENST00000424406.2	NK2 homeobox 5	47	Sites in UTR	4	0	4	0	1	mmu-miR-3960	-1.11	-1.23	N/A
AC024940.1	ENST00000313737.4		5	Sites in UTR	1	1	0	0	1	mmu-miR-3960	-0.89	-0.89	N/A
C9orf117	ENST00000373293.5	chromosome 9 open reading frame 117	5	Sites in UTR	1	1	0	0	0	mmu-miR-3960	-0.88	-0.88	N/A
TUBB6	ENST00000591208.1	tubulin, beta 6 class V	5820	Sites in UTR	1	1	0	0	0	mmu-miR-3960	-0.85	-0.88	N/A
C12orf61	ENST00000408887.2	chromosome 12 open reading frame 61	5	Sites in UTR	2	0	1	1	0	mmu-miR-3960	-0.83	-0.83	N/A
TMEM217	ENST00000336655.2	transmembrane protein 217	44	Sites in UTR	1	1	0	0	1	mmu-miR-3960	-0.82	-0.82	N/A
Ortholog of target gene	Representative transcript	Gene name	Number of 3P-seq tags supporting UTR + 5	Link to sites in UTRs	Site counts				6mer sites	Representative miRNA	Cumulative weighted context++ score	Total context++ score	Aggregate PCT
					total	8mer	7mer-m8	7mer-A1
APOC2	ENST00000585786.1	apolipoprotein C-II	2242	Sites in UTR	6	0	6	0	0	mmu-miR-1943-5p	-2.1	-2.1	N/A
TGM7	ENST00000452443.2	transglutaminase 7	5	Sites in UTR	7	0	7	0	0	mmu-miR-1943-5p	-1.82	-1.82	N/A
GATS	ENST00000436886.2	GATS, stromal antigen 3 opposite strand	86	Sites in UTR	2	1	1	0	0	mmu-miR-1943-5p	-1.27	-1.4	N/A
LENG8	ENST00000326764.5	leukocyte receptor cluster (LRC) member 8	244	Sites in UTR	6	0	6	0	1	mmu-miR-1943-5p	-1.24	-1.24	N/A
SHISA7	ENST00000376325.4	shisa family member 7	5	Sites in UTR	5	0	5	0	4	mmu-miR-1943-5p	-1.23	-1.23	N/A
TMEM253	ENST00000418511.2	transmembrane protein 253	25	Sites in UTR	4	0	4	0	1	mmu-miR-1943-5p	-1.13	-1.13	N/A
NOVA2	ENST00000263257.5	neuro-oncological ventral antigen 2	7	Sites in UTR	6	1	4	1	3	mmu-miR-1943-5p	-1.12	-1.69	N/A
CCDC135	ENST00000394337.4	coiled-coil domain containing 135	11	Sites in UTR	2	1	1	0	1	mmu-miR-1943-5p	-1.03	-1.03	N/A
ARHGDIA	ENST00000269321.7	Rho GDP dissociation inhibitor (GDI) alpha	452	Sites in UTR	4	2	2	0	3	mmu-miR-1943-5p	-1.02	-1.4	N/A
PRRT2	ENST00000300797.6	proline-rich transmembrane protein 2	33	Sites in UTR	3	2	1	0	3	mmu-miR-1943-5p	-0.99	-0.99	N/A
IKZF4	ENST00000262032.5	IKAROS family zinc finger 4 (Eos)	329	Sites in UTR	6	0	4	2	3	mmu-miR-1943-5p	-0.94	-0.98	N/A
ARF3	ENST00000256682.4	ADP-ribosylation factor 3	1093	Sites in UTR	4	0	4	0	2	mmu-miR-1943-5p	-0.93	-1.01	N/A
KDELR3	ENST00000216014.4	KDEL (Lys-Asp-Glu-Leu) endoplasmic reticulum protein retention receptor 3	329	Sites in UTR	2	2	0	0	0	mmu-miR-1943-5p	-0.92	-1.02	N/A
RP11-126K1.2	ENST00000447795.2	Uncharacterized protein	145	Sites in UTR	1	1	0	0	0	mmu-miR-1943-5p	-0.91	-1	N/A
VAT1	ENST00000355653.3	vesicle amine transport 1	2844	Sites in UTR	4	0	3	1	2	mmu-miR-1943-5p	-0.89	-0.89	N/A
ARNT2	ENST00000303329.4	aryl-hydrocarbon receptor nuclear translocator 2	39	Sites in UTR	5	0	5	0	4	mmu-miR-1943-5p	-0.88	-0.88	N/A
GPR173	ENST00000332582.4	G protein-coupled receptor 173	99	Sites in UTR	4	2	1	1	0	mmu-miR-1943-5p	-0.87	-0.91	N/A
MUL1	ENST00000264198.3	mitochondrial E3 ubiquitin protein ligase 1	812	Sites in UTR	4	0	4	0	6	mmu-miR-1943-5p	-0.87	-0.88	N/A
TRIM58	ENST00000366481.3	tripartite motif containing 58	68	Sites in UTR	5	0	5	0	7	mmu-miR-1943-5p	-0.83	-0.84	N/A
OR2H2	ENST00000383640.2	olfactory receptor, family 2, subfamily H, member 2	5	Sites in UTR	1	1	0	0	0	mmu-miR-1943-5p	-0.83	-0.83	N/A
RNF165	ENST00000269439.7	ring finger protein 165	18	Sites in UTR	4	2	1	1	0	mmu-miR-1943-5p	-0.83	-0.83	N/A
KLK4	ENST00000324041.1	kallikrein-related peptidase 4	5	Sites in UTR	3	0	3	0	1	mmu-miR-1943-5p	-0.82	-0.82	N/A
GRAMD2	ENST00000309731.7	GRAM domain containing 2	5	Sites in UTR	4	1	2	1	1	mmu-miR-1943-5p	-0.82	-0.82	N/A
ATXN7L3	ENST00000454077.2	ataxin 7-like 3	43	Sites in UTR	4	1	3	0	4	mmu-miR-1943-5p	-0.82	-0.86	N/A
BAZ2A	ENST00000379441.3	bromodomain adjacent to zinc finger domain, 2A	48	Sites in UTR	6	2	4	0	3	mmu-miR-1943-5p	-0.81	-1.02	N/A
PCBD1	ENST00000299299.3	pterin-4 alpha-carbinolamine dehydratase/dimerization cofactor of hepatocyte nuclear factor 1 alpha	286	Sites in UTR	1	1	0	0	2	mmu-miR-1943-5p	-0.8	-0.82	N/A
Ortholog of target gene	Representative transcript	Gene name	Number of 3P-seq tags supporting UTR + 5	Link to sites in UTRs	Site counts				6mer sites	Representative miRNA	Cumulative weighted context++ score	Total context++ score	Aggregate PCT
					total	8mer	7mer-m8	7mer-A1
RP11-625H11.1	ENST00000558940.1	Uncharacterized protein	5	Sites in UTR	2	1	1	0	1	mmu-miR-5621-5p	-0.98	-0.98	N/A
ZIK1	ENST00000307468.4	zinc finger protein interacting with K protein 1	64	Sites in UTR	4	0	2	2	0	mmu-miR-5621-5p	-0.98	-1.01	N/A
PVRL4	ENST00000368012.3	poliovirus receptor-related 4	6	Sites in UTR	2	2	0	0	0	mmu-miR-5621-5p	-0.88	-0.88	N/A
LIN52	ENST00000555028.1	lin-52 homolog (C. elegans)	116	Sites in UTR	3	1	0	2	1	mmu-miR-5621-5p	-0.84	-0.84	N/A
TOMM5	ENST00000377773.5	translocase of outer mitochondrial membrane 5 homolog (yeast)	12658	Sites in UTR	1	1	0	0	0	mmu-miR-5621-5p	-0.81	-0.82	N/A
AL162407.1	ENST00000451472.1	CDNA FLJ20147 fis, clone COL07954; HCG1781466; Uncharacterized protein	253	Sites in UTR	2	1	1	0	0	mmu-miR-5621-5p	-0.8	-0.8	N/A
Ortholog of target gene	Representative transcript	Gene name	Number of 3P-seq tags supporting UTR + 5	Link to sites in UTRs	Site counts				6mer sites	Representative miRNA	Cumulative weighted context++ score	Total context++ score	Aggregate PCT
					total	8mer	7mer-m8	7mer-A1
GIPC3	ENST00000322315.5	GIPC PDZ domain containing family, member 3	48	Sites in UTR	17	3	10	4	2	mmu-miR-7648-3p	-4.67	-4.67	N/A
SDK2	ENST00000392650.3	sidekick cell adhesion molecule 2	8	Sites in UTR	9	6	2	1	0	mmu-miR-7648-3p	-3.21	-3.21	N/A
DLEC1	ENST00000308059.6	deleted in lung and esophageal cancer 1	5	Sites in UTR	8	1	7	0	0	mmu-miR-7648-3p	-1.51	-1.51	N/A
APOC2	ENST00000585786.1	apolipoprotein C-II	2242	Sites in UTR	4	0	4	0	0	mmu-miR-7648-3p	-1.37	-1.37	N/A
MORN4	ENST00000478953.1	MORN repeat containing 4	296	Sites in UTR	4	0	3	1	0	mmu-miR-7648-3p	-1.13	-1.13	N/A
AC012360.2	ENST00000595531.1	LOC644617 protein; Uncharacterized protein	430	Sites in UTR	3	1	0	2	1	mmu-miR-7648-3p	-1.12	-1.17	N/A
ZNF469	ENST00000437464.1	zinc finger protein 469	139	Sites in UTR	2	1	0	1	2	mmu-miR-7648-3p	-1.08	-1.15	N/A
LMX1B	ENST00000355497.5	LIM homeobox transcription factor 1, beta	8	Sites in UTR	7	1	5	1	1	mmu-miR-7648-3p	-1.07	-1.07	N/A
FAM219A	ENST00000379089.1	family with sequence similarity 219, member A	13	Sites in UTR	4	2	2	0	0	mmu-miR-7648-3p	-1.06	-1.06	N/A
ARHGDIA	ENST00000269321.7	Rho GDP dissociation inhibitor (GDI) alpha	452	Sites in UTR	3	2	1	0	0	mmu-miR-7648-3p	-1.06	-1.25	N/A
ARC	ENST00000356613.2	activity-regulated cytoskeleton-associated protein	5	Sites in UTR	5	0	3	2	0	mmu-miR-7648-3p	-1.04	-1.04	N/A
KLF16	ENST00000250916.4	Kruppel-like factor 16	5	Sites in UTR	3	1	2	0	0	mmu-miR-7648-3p	-0.95	-0.95	N/A
CD3E	ENST00000361763.4	CD3e molecule, epsilon (CD3-TCR complex)	5	Sites in UTR	3	0	3	0	0	mmu-miR-7648-3p	-0.92	-0.92	N/A
MDGA1	ENST00000297153.7	MAM domain containing glycosylphosphatidylinositol anchor 1	240	Sites in UTR	4	3	0	1	2	mmu-miR-7648-3p	-0.91	-0.92	N/A
RGS12	ENST00000538395.1	regulator of G-protein signaling 12	635	Sites in UTR	4	1	1	2	3	mmu-miR-7648-3p	-0.87	-0.87	N/A
TNNI1	ENST00000361379.4	troponin I type 1 (skeletal, slow)	5	Sites in UTR	5	0	5	0	1	mmu-miR-7648-3p	-0.86	-0.86	N/A
RP11-131H24.4	ENST00000557646.1	Uncharacterized protein	5	Sites in UTR	1	1	0	0	0	mmu-miR-7648-3p	-0.85	-0.85	N/A
KRTAP1-5	ENST00000361883.5	keratin associated protein 1-5	67	Sites in UTR	1	1	0	0	1	mmu-miR-7648-3p	-0.85	-0.85	N/A
USF2	ENST00000343550.5	upstream transcription factor 2, c-fos interacting	1981	Sites in UTR	2	1	1	0	0	mmu-miR-7648-3p	-0.84	-0.85	N/A
SLC38A1	ENST00000398637.5	solute carrier family 38, member 1	1967	Sites in UTR	6	0	3	3	1	mmu-miR-7648-3p	-0.81	-0.85	N/A
Ortholog of target gene	Representative transcript	Gene name	Number of 3P-seq tags supporting UTR + 5	Link to sites in UTRs	Site counts				6mer sites	Representative miRNA	Cumulative weighted context++ score	Total context++ score	Aggregate PCT
					total	8mer	7mer-m8	7mer-A1
CDR1as	CDR1as	circular RNA CDR1as	1	Sites in UTR	7	4	3	0	1	mmu-miR-6368	-11.15	-11.15	N/A
CD79A	ENST00000221972.3	CD79a molecule, immunoglobulin-associated alpha	5	Sites in UTR	3	2	1	0	0	mmu-miR-6368	-1.36	-1.36	N/A
TGM7	ENST00000452443.2	transglutaminase 7	5	Sites in UTR	8	0	8	0	0	mmu-miR-6368	-1.23	-1.23	N/A
SOSTDC1	ENST00000307068.4	sclerostin domain containing 1	5	Sites in UTR	3	1	1	1	0	mmu-miR-6368	-1.03	-1.03	N/A
MYO6	ENST00000369981.3	myosin VI	297	Sites in UTR	1*	0	0	0	3	mmu-miR-3547-5p	-1	0	N/A
PRX	ENST00000291825.7	periaxin	17	Sites in UTR	6	3	1	2	1	mmu-miR-6368	-0.97	-0.97	N/A
EBP	ENST00000495186.1	emopamil binding protein (sterol isomerase)	48655	Sites in UTR	2	1	1	0	0	mmu-miR-6368	-0.86	-0.86	N/A
HSPA13	ENST00000285667.3	heat shock protein 70kDa family, member 13	2175	Sites in UTR	3	2	0	1	0	mmu-miR-6368	-0.81	-0.89	N/A
Target gene	Representative transcript	Gene name	Number of 3P-seq tags supporting UTR + 5	Link to sites in UTRs	Site counts				6mer sites	Representative miRNA	Cumulative weighted context++ score	Total context++ score	Aggregate PCT
					total	8mer	7mer-m8	7mer-A1
Gm2564	ENSMUST00000166898.2	predicted gene 2564	5	Sites in UTR	2	1	1	0	0	mmu-miR-1934-5p	-1.91	-1.91	N/A
Kdelc2	ENSMUST00000037853.3	KDEL (Lys-Asp-Glu-Leu) containing 2	463	Sites in UTR	2	1	0	1	1	mmu-miR-1934-5p	-1.54	-1.56	N/A
Zfp113	ENSMUST00000049393.9	zinc finger protein 113	87	Sites in UTR	3	0	2	1	4	mmu-miR-1934-5p	-1.51	-1.73	N/A
Gna12	ENSMUST00000000153.4	guanine nucleotide binding protein, alpha 12	537	Sites in UTR	2	1	1	0	1	mmu-miR-1934-5p	-1.49	-1.5	N/A
Fkbp2	ENSMUST00000177752.2	FK506 binding protein 2	156	Sites in UTR	2	2	0	0	0	mmu-miR-1934-5p	-1.45	-1.48	N/A
Scarf1	ENSMUST00000118243.1	scavenger receptor class F, member 1	366	Sites in UTR	2	1	0	1	0	mmu-miR-1934-5p	-1.37	-1.37	N/A
Entpd7	ENSMUST00000081079.5	ectonucleoside triphosphate diphosphohydrolase 7	146	Sites in UTR	1	1	0	0	4	mmu-miR-1934-5p	-1.23	-1.36	N/A
Carf	ENSMUST00000187978.1	calcium response factor	76	Sites in UTR	1	1	0	0	2	mmu-miR-1934-5p	-1.22	-1.31	N/A
Lmo2	ENSMUST00000170926.2	LIM domain only 2	718	Sites in UTR	2	0	2	0	0	mmu-miR-1934-5p	-1.21	-1.21	N/A
Msi1	ENSMUST00000150779.2	musashi RNA-binding protein 1	72	Sites in UTR	2	1	0	1	0	mmu-miR-1934-5p	-1.21	-1.21	N/A
Pnpla1	ENSMUST00000114737.2	patatin-like phospholipase domain containing 1	5	Sites in UTR	3	0	2	1	0	mmu-miR-1934-5p	-1.21	-1.21	N/A
Rnf141	ENSMUST00000177236.2	ring finger protein 141	3667	Sites in UTR	2	1	0	1	0	mmu-miR-1934-5p	-1.21	-1.23	N/A
Zpbp2	ENSMUST00000081033.7	zona pellucida binding protein 2	6	Sites in UTR	1	1	0	0	0	mmu-miR-1934-5p	-1.21	-1.21	N/A
ARHGAP30	ENSMUST00000189270.1	Rho GTPase-activating protein 30	78	Sites in UTR	1	1	0	0	0	mmu-miR-1934-5p	-1.19	-1.19	N/A
Kcne3	ENSMUST00000178946.2	potassium voltage-gated channel, Isk-related subfamily, gene 3	35	Sites in UTR	1	1	0	0	0	mmu-miR-1934-5p	-1.18	-1.18	N/A
Mgat5	ENSMUST00000038361.5	mannoside acetylglucosaminyltransferase 5	770	Sites in UTR	2	1	0	1	1	mmu-miR-1934-5p	-1.17	-1.19	N/A
Tmem211	ENSMUST00000086615.2	transmembrane protein 211	5	Sites in UTR	2	0	2	0	1	mmu-miR-1934-5p	-1.16	-1.16	N/A
Pcsk9	ENSMUST00000049507.5	proprotein convertase subtilisin/kexin type 9	703	Sites in UTR	2	1	1	0	2	mmu-miR-1934-5p	-1.14	-1.68	N/A
Pitpnb	ENSMUST00000086635.4	phosphatidylinositol transfer protein, beta	1119	Sites in UTR	3	0	2	1	0	mmu-miR-1934-5p	-1.13	-1.25	N/A
Ccl19	ENSMUST00000102957.3	chemokine (C-C motif) ligand 19	5	Sites in UTR	2	1	1	0	0	mmu-miR-1934-5p	-1.11	-1.11	N/A
Cphx3	ENSMUST00000184577.2	cytoplasmic polyadenylated homeobox 3	5	Sites in UTR	1	1	0	0	0	mmu-miR-1934-5p	-1.11	-1.11	N/A
Gdpd5	ENSMUST00000037528.8	glycerophosphodiester phosphodiesterase domain containing 5	225	Sites in UTR	3	0	2	1	0	mmu-miR-1934-5p	-1.11	-1.4	N/A
Lrrc14b	ENSMUST00000022064.4	leucine rich repeat containing 14B	240	Sites in UTR	1	1	0	0	0	mmu-miR-1934-5p	-1.09	-1.09	N/A
Galm	ENSMUST00000039205.5	galactose mutarotase	674	Sites in UTR	1	1	0	0	1	mmu-miR-1934-5p	-1.09	-1.18	N/A
H2-Q6	ENSMUST00000174699.2	histocompatibility 2, Q region locus 6	5	Sites in UTR	1	1	0	0	0	mmu-miR-1934-5p	-1.08	-1.08	N/A
Hdac11	ENSMUST00000041736.5	histone deacetylase 11	663	Sites in UTR	1	1	0	0	1	mmu-miR-1934-5p	-1.08	-1.08	N/A
Plce1	ENSMUST00000169713.3	phospholipase C, epsilon 1	216	Sites in UTR	2	1	1	0	0	mmu-miR-1934-5p	-1.08	-1.2	N/A
Ikzf1	ENSMUST00000076700.5	IKAROS family zinc finger 1	174	Sites in UTR	2	1	0	1	1	mmu-miR-1934-5p	-1.05	-1.34	N/A
Cd300lb	ENSMUST00000106581.2	CD300 antigen like family member B	13	Sites in UTR	2	0	2	0	1	mmu-miR-1934-5p	-1.04	-1.04	N/A
Otub2	ENSMUST00000179684.1	OTU domain, ubiquitin aldehyde binding 2	41	Sites in UTR	2	1	0	1	0	mmu-miR-1934-5p	-1.03	-1.23	N/A
Ccdc130	ENSMUST00000005120.6	coiled-coil domain containing 130	714	Sites in UTR	2	1	1	0	0	mmu-miR-1934-5p	-1.03	-1.03	N/A
Dok1	ENSMUST00000089651.5	docking protein 1	47	Sites in UTR	1	1	0	0	2	mmu-miR-1934-5p	-1.01	-1.01	N/A
Pef1	ENSMUST00000118199.2	penta-EF hand domain containing 1	2843	Sites in UTR	1	1	0	0	0	mmu-miR-1934-5p	-1	-1	N/A
Ppp1r9b	ENSMUST00000038696.6	protein phosphatase 1, regulatory subunit 9B	1961	Sites in UTR	1	1	0	0	1	mmu-miR-1934-5p	-1	-1.01	N/A
Gm10093	ENSMUST00000079363.4	predicted pseudogene 10093	8	Sites in UTR	1	1	0	0	0	mmu-miR-1934-5p	-1	-1	N/A
Cmpk2	ENSMUST00000020969.3	cytidine monophosphate (UMP-CMP) kinase 2, mitochondrial	584	Sites in UTR	1	1	0	0	1	mmu-miR-1934-5p	-0.99	-1.08	N/A
Adcy1	ENSMUST00000020706.4	adenylate cyclase 1	52	Sites in UTR	1	1	0	0	1	mmu-miR-1934-5p	-0.94	-1.01	N/A
Nuak2	ENSMUST00000082125.5	NUAK family, SNF1-like kinase, 2	47	Sites in UTR	1	1	0	0	0	mmu-miR-1934-5p	-0.94	-0.94	N/A
Pygo1	ENSMUST00000038489.5	pygopus 1	359	Sites in UTR	1	1	0	0	1	mmu-miR-1934-5p	-0.93	-0.98	N/A
Amer3	ENSMUST00000052670.9	APC membrane recruitment 3	5	Sites in UTR	3	1	1	1	1	mmu-miR-1934-5p	-0.91	-0.91	N/A
Trabd	ENSMUST00000081702.6	TraB domain containing	496	Sites in UTR	1	1	0	0	0	mmu-miR-1934-5p	-0.91	-1.11	N/A
Ngfr	ENSMUST00000000122.6	nerve growth factor receptor (TNFR superfamily, member 16)	14	Sites in UTR	2	0	1	1	0	mmu-miR-1934-5p	-0.88	-0.88	N/A
Fam71e1	ENSMUST00000107927.3	family with sequence similarity 71, member E1	49	Sites in UTR	1	1	0	0	0	mmu-miR-1934-5p	-0.85	-0.85	N/A
Rras	ENSMUST00000044111.7	Harvey rat sarcoma oncogene, subgroup R	723	Sites in UTR	1	0	1	0	1	mmu-miR-1934-5p	-0.85	-0.86	N/A
Nkap	ENSMUST00000016553.4	NFKB activating protein	757	Sites in UTR	1	1	0	0	0	mmu-miR-1934-5p	-0.84	-1.01	N/A
Gale	ENSMUST00000102541.4	galactose-4-epimerase, UDP	140	Sites in UTR	2	1	0	1	0	mmu-miR-1934-5p	-0.84	-0.84	N/A
Stk3	ENSMUST00000018476.8	serine/threonine kinase 3	31	Sites in UTR	4	1	1	2	0	mmu-miR-1934-5p	-0.83	-0.89	N/A
Sprr2a1	ENSMUST00000074449.5	small proline-rich protein 2A1	5	Sites in UTR	2	0	1	1	0	mmu-miR-1934-5p	-0.81	-0.81	N/A
Scnn1a	ENSMUST00000081440.8	sodium channel, nonvoltage-gated 1 alpha	2942	Sites in UTR	2	0	1	1	0	mmu-miR-1934-5p	-0.81	-0.82	N/A
Mgat5b	ENSMUST00000103027.4	mannoside acetylglucosaminyltransferase 5, isoenzyme B	32	Sites in UTR	2	1	1	0	1	mmu-miR-1934-5p	-0.81	-0.81	N/A
Sec11c	ENSMUST00000025394.7	SEC11 homolog C (S. cerevisiae)	1122	Sites in UTR	2	2	0	0	1	mmu-miR-1934-5p	-0.81	-1.17	N/A
Glyr1	ENSMUST00000023189.8	glyoxylate reductase 1 homolog (Arabidopsis)	448	Sites in UTR	2	1	1	0	1	mmu-miR-1934-5p	-0.8	-0.81	N/A
Lif	ENSMUST00000066283.6	leukemia inhibitory factor	146	Sites in UTR	2	2	0	0	2	mmu-miR-1934-5p	-0.8	-0.8	N/A
Treml2	ENSMUST00000170941.1	triggering receptor expressed on myeloid cells-like 2	20	Sites in UTR	2	0	1	1	1	mmu-miR-1934-5p	-0.8	-0.92	N/A
Target gene	Representative transcript	Gene name	Number of 3P-seq tags supporting UTR + 5	Link to sites in UTRs	Site counts				6mer sites	Representative miRNA	Cumulative weighted context++ score	Total context++ score	Aggregate PCT
					total	8mer	7mer-m8	7mer-A1
Zfp738	ENSMUST00000137496.3	zinc finger protein 738	14	Sites in UTR	5	5	0	0	0	mmu-miR-7046-5p	-4.45	-4.45	N/A
6720489N17Rik	ENSMUST00000091563.4	RIKEN cDNA 6720489N17 gene	49	Sites in UTR	5	5	0	0	0	mmu-miR-7046-5p	-3.24	-3.24	N/A
A530054K11Rik	ENSMUST00000012314.8	RIKEN cDNA A530054K11 gene	22	Sites in UTR	4	1	2	1	0	mmu-miR-7046-5p	-2.98	-3.46	N/A
Zfp429	ENSMUST00000181071.2	zinc finger protein 429	9	Sites in UTR	5	4	0	1	1	mmu-miR-7046-5p	-2.55	-2.64	N/A
Slc41a1	ENSMUST00000086559.6	solute carrier family 41, member 1	351	Sites in UTR	2	1	0	1	1	mmu-miR-7046-5p	-1.73	-1.75	N/A
Gm2381	ENSMUST00000174558.1	predicted gene 2381	14	Sites in UTR	2	2	0	0	0	mmu-miR-7046-5p	-1.71	-1.71	N/A
Adamts10	ENSMUST00000087623.7	a disintegrin-like and metallopeptidase (reprolysin type) with thrombospondin type 1 motif, 10	641	Sites in UTR	2	1	0	1	0	mmu-miR-7046-5p	-1.58	-1.58	N/A
Gm11007	ENSMUST00000178120.2	predicted gene 11007	0	Sites in UTR	3	0	0	3	2	mmu-miR-7046-5p	-1.53	-1.53	N/A
Gm2007	ENSMUST00000178133.2	predicted gene 2007	0	Sites in UTR	3	0	0	3	2	mmu-miR-7046-5p	-1.53	-1.53	N/A
Gm5141	ENSMUST00000167516.2	predicted gene 5141	98	Sites in UTR	1	1	0	0	0	mmu-miR-7046-5p	-1.44	-1.44	N/A
Tes	ENSMUST00000076654.7	testis derived transcript	1612	Sites in UTR	1	1	0	0	0	mmu-miR-7046-5p	-1.39	-1.39	N/A
Zfp72	ENSMUST00000091481.2	zinc finger protein 72	209	Sites in UTR	1	1	0	0	0	mmu-miR-7046-5p	-1.35	-1.35	N/A
Gpr45	ENSMUST00000179766.2	G protein-coupled receptor 45	5	Sites in UTR	2	1	0	1	1	mmu-miR-7046-5p	-1.34	-1.34	N/A
Zfp936	ENSMUST00000072829.3	zinc finger protein 936	2	Sites in UTR	2	1	0	1	0	mmu-miR-7046-5p	-1.33	-1.33	N/A
Gm10030	ENSMUST00000080872.4	predicted gene 10030	13	Sites in UTR	1	1	0	0	1	mmu-miR-7046-5p	-1.23	-1.23	N/A
Muc19	ENSMUST00000178108.1	mucin 19	5	Sites in UTR	1	1	0	0	0	mmu-miR-7046-5p	-1.22	-1.22	N/A
Atp6ap1	ENSMUST00000114171.4	ATPase, H+ transporting, lysosomal accessory protein 1	3005	Sites in UTR	1	1	0	0	0	mmu-miR-7046-5p	-1.21	-1.21	N/A
Idi2	ENSMUST00000038598.2	isopentenyl-diphosphate delta isomerase 2	5	Sites in UTR	2	0	2	0	0	mmu-miR-7046-5p	-1.17	-1.17	N/A
Cd3g	ENSMUST00000002101.6	CD3 antigen, gamma polypeptide	27	Sites in UTR	1	1	0	0	1	mmu-miR-7046-5p	-1.11	-1.21	N/A
Fut7	ENSMUST00000114278.3	fucosyltransferase 7	6	Sites in UTR	1	1	0	0	0	mmu-miR-7046-5p	-1.04	-1.04	N/A
Gfra2	ENSMUST00000022699.8	glial cell line derived neurotrophic factor family receptor alpha 2	239	Sites in UTR	3	1	0	2	0	mmu-miR-7046-5p	-1.03	-1.04	N/A
Cacfd1	ENSMUST00000114007.2	calcium channel flower domain containing 1	785	Sites in UTR	1	1	0	0	1	mmu-miR-7046-5p	-1.03	-1.1	N/A
Kcnk6	ENSMUST00000085818.4	potassium inwardly-rectifying channel, subfamily K, member 6	41	Sites in UTR	3	2	0	1	0	mmu-miR-7046-5p	-1	-1.02	N/A
Heyl	ENSMUST00000040821.4	hairy/enhancer-of-split related with YRPW motif-like	163	Sites in UTR	3	0	2	1	0	mmu-miR-7046-5p	-1	-1.23	N/A
Gon4l	ENSMUST00000107498.3	gon-4-like (C.elegans)	1695	Sites in UTR	3	2	0	1	0	mmu-miR-7046-5p	-1	-1	N/A
Scamp4	ENSMUST00000079883.5	secretory carrier membrane protein 4	3419	Sites in UTR	1	1	0	0	0	mmu-miR-7046-5p	-0.99	-1	N/A
Erv3	ENSMUST00000040941.2	endogenous retroviral sequence 3	5	Sites in UTR	2	1	1	0	0	mmu-miR-7046-5p	-0.97	-0.97	N/A
EU599041	ENSMUST00000163106.1	expressed sequence EU599041	8	Sites in UTR	1	1	0	0	0	mmu-miR-7046-5p	-0.95	-0.95	N/A
Gm21092	ENSMUST00000178995.1	predicted gene, 21092	5	Sites in UTR	2	0	2	0	0	mmu-miR-7046-5p	-0.93	-0.93	N/A
Gm5595	ENSMUST00000107992.1	predicted gene 5595	7	Sites in UTR	1	1	0	0	0	mmu-miR-7046-5p	-0.9	-0.9	N/A
Gm7221	ENSMUST00000173283.1	predicted gene 7221	13	Sites in UTR	2	1	1	0	0	mmu-miR-7046-5p	-0.9	-1.2	N/A
Zfp748	ENSMUST00000181892.2	zinc finger protein 748	278	Sites in UTR	1	1	0	0	0	mmu-miR-7046-5p	-0.89	-0.89	N/A
Cenpt	ENSMUST00000040776.4	centromere protein T	161	Sites in UTR	1	1	0	0	1	mmu-miR-7046-5p	-0.88	-0.88	N/A
Zfp65	ENSMUST00000127979.2	zinc finger protein 65	45	Sites in UTR	1	1	0	0	0	mmu-miR-7046-5p	-0.87	-0.96	N/A
9830147E19Rik	ENSMUST00000098503.3	RIKEN cDNA 9830147E19 gene	2	Sites in UTR	1	1	0	0	0	mmu-miR-7046-5p	-0.86	-0.86	N/A
Myct1	ENSMUST00000051809.8	myc target 1	499	Sites in UTR	2	1	0	1	0	mmu-miR-7046-5p	-0.85	-1.01	N/A
Zfp935	ENSMUST00000076195.5	zinc finger protein 935	20	Sites in UTR	1	1	0	0	0	mmu-miR-7046-5p	-0.85	-0.85	N/A
Sfmbt2	ENSMUST00000041105.6	Scm-like with four mbt domains 2	19	Sites in UTR	1	1	0	0	0	mmu-miR-7046-5p	-0.85	-0.85	N/A
Epas1	ENSMUST00000024954.9	endothelial PAS domain protein 1	55091	Sites in UTR	5	0	0	5	0	mmu-miR-7046-5p	-0.85	-0.85	N/A
Igf2	ENSMUST00000000033.6	insulin-like growth factor 2	20	Sites in UTR	1	0	0	1	3	mmu-miR-7046-5p	-0.85	-0.85	N/A
E030018B13Rik	ENSMUST00000177638.1	RIKEN cDNA E030018B13 gene	16	Sites in UTR	2	1	0	1	0	mmu-miR-7046-5p	-0.84	-0.84	N/A
Zfp703	ENSMUST00000127097.2	zinc finger protein 703	652	Sites in UTR	2	1	1	0	3	mmu-miR-7046-5p	-0.83	-0.83	N/A
Podxl	ENSMUST00000026698.7	podocalyxin-like	642	Sites in UTR	3	1	0	2	0	mmu-miR-7046-5p	-0.83	-0.84	N/A
Slc7a8	ENSMUST00000022787.6	solute carrier family 7 (cationic amino acid transporter, y+ system), member 8	33	Sites in UTR	3	1	2	0	0	mmu-miR-7046-5p	-0.81	-0.81	N/A
Zfp386	ENSMUST00000183125.1	zinc finger protein 386 (Kruppel-like)	462	Sites in UTR	2	2	0	0	0	mmu-miR-7046-5p	-0.81	-1.85	N/A
Denr	ENSMUST00000023869.9	density-regulated protein	3850	Sites in UTR	1	1	0	0	0	mmu-miR-7046-5p	-0.8	-0.81	N/A
Ppt1	ENSMUST00000030412.5	palmitoyl-protein thioesterase 1	960	Sites in UTR	2	1	1	0	0	mmu-miR-7046-5p	-0.8	-0.95	N/A
Cxcl17	ENSMUST00000074040.3	chemokine (C-X-C motif) ligand 17	238	Sites in UTR	1	1	0	0	0	mmu-miR-7046-5p	-0.8	-0.8	N/A
Target gene	Representative transcript	Gene name	Number of 3P-seq tags supporting UTR + 5	Link to sites in UTRs	Site counts				6mer sites	Representative miRNA	Cumulative weighted context++ score	Total context++ score	Aggregate PCT
					total	8mer	7mer-m8	7mer-A1
Lag3	ENSMUST00000032217.1	lymphocyte-activation gene 3	6	Sites in UTR	3	1	2	0	0	mmu-miR-5126	-1.69	-1.69	N/A
Gm10642	ENSMUST00000098589.2	predicted gene 10642	6	Sites in UTR	2	0	2	0	3	mmu-miR-5126	-0.9	-0.9	N/A
Zscan2	ENSMUST00000044115.7	zinc finger and SCAN domain containing 2	71	Sites in UTR	1	0	1	0	0	mmu-miR-5126	-0.86	-0.86	N/A
Sp5	ENSMUST00000100043.2	trans-acting transcription factor 5	115	Sites in UTR	1	1	0	0	0	mmu-miR-5126	-0.81	-0.81	N/A
Target gene	Representative transcript	Gene name	Number of 3P-seq tags supporting UTR + 5	Link to sites in UTRs	Site counts				6mer sites	Representative miRNA	Cumulative weighted context++ score	Total context++ score	Aggregate PCT
					total	8mer	7mer-m8	7mer-A1
Stk32b	ENSMUST00000094836.4	serine/threonine kinase 32B	7	Sites in UTR	12	4	8	0	1	mmu-miR-7081-5p	-5.81	-5.81	N/A
Sec22c	ENSMUST00000078547.5	SEC22 vesicle trafficking protein homolog C (S. cerevisiae)	124	Sites in UTR	26	0	25	1	0	mmu-miR-7081-5p	-2.72	-6.47	N/A
Fbxw8	ENSMUST00000049474.7	F-box and WD-40 domain protein 8	1748	Sites in UTR	6	2	2	2	3	mmu-miR-7081-5p	-2.21	-3.59	N/A
Mospd3	ENSMUST00000111007.2	motile sperm domain containing 3	45	Sites in UTR	7	0	7	0	0	mmu-miR-7081-5p	-2.21	-2.21	N/A
Rgs8	ENSMUST00000041776.6	regulator of G-protein signaling 8	5	Sites in UTR	4	1	3	0	0	mmu-miR-7081-5p	-2.2	-2.2	N/A
Hs6st3	ENSMUST00000065904.3	heparan sulfate 6-O-sulfotransferase 3	6	Sites in UTR	8	0	7	1	3	mmu-miR-7081-5p	-1.96	-1.96	N/A
Baz2a	ENSMUST00000170054.3	bromodomain adjacent to zinc finger domain, 2A	99	Sites in UTR	6	1	2	3	4	mmu-miR-7081-5p	-1.95	-3.36	N/A
Gdpd4	ENSMUST00000041860.7	glycerophosphodiester phosphodiesterase domain containing 4	5	Sites in UTR	3	1	1	1	0	mmu-miR-7081-5p	-1.95	-1.95	N/A
Nkain2	ENSMUST00000191234.1	Na+/K+ transporting ATPase interacting 2	9	Sites in UTR	3	1	1	1	1	mmu-miR-7081-5p	-1.94	-1.94	N/A
Lrrc59	ENSMUST00000021239.6	leucine rich repeat containing 59	13744	Sites in UTR	2	2	0	0	0	mmu-miR-7081-5p	-1.94	-2.01	N/A
Dpysl5	ENSMUST00000114729.2	dihydropyrimidinase-like 5	364	Sites in UTR	3	0	3	0	2	mmu-miR-7081-5p	-1.89	-1.95	N/A
Vamp2	ENSMUST00000117780.1	vesicle-associated membrane protein 2	828	Sites in UTR	4	0	4	0	3	mmu-miR-7081-5p	-1.8	-2.19	N/A
Wnt8b	ENSMUST00000041163.4	wingless related MMTV integration site 8b	5	Sites in UTR	3	1	1	1	2	mmu-miR-7081-5p	-1.77	-1.77	N/A
Tet3	ENSMUST00000089622.5	tet methylcytosine dioxygenase 3	1592	Sites in UTR	2	1	1	0	4	mmu-miR-7081-5p	-1.76	-1.77	N/A
Slc35d1	ENSMUST00000150285.2	solute carrier family 35 (UDP-glucuronic acid/UDP-N-acetylgalactosamine dual transporter), member D1	1103	Sites in UTR	7	0	7	0	0	mmu-miR-7081-5p	-1.76	-1.93	N/A
Sbk3	ENSMUST00000144863.2	SH3 domain binding kinase family, member 3	10	Sites in UTR	6	0	6	0	7	mmu-miR-7081-5p	-1.74	-1.74	N/A
Gpr56	ENSMUST00000179619.2	G protein-coupled receptor 56	568	Sites in UTR	4	0	3	1	0	mmu-miR-7081-5p	-1.71	-1.73	N/A
Mylk4	ENSMUST00000057428.5	myosin light chain kinase family, member 4	9397	Sites in UTR	10	1	9	0	2	mmu-miR-7081-5p	-1.65	-1.67	N/A
A1cf	ENSMUST00000075838.5	APOBEC1 complementation factor	2067	Sites in UTR	10	2	7	1	0	mmu-miR-7081-5p	-1.6	-1.79	N/A
Six3	ENSMUST00000176081.2	sine oculis-related homeobox 3	5	Sites in UTR	2	0	2	0	5	mmu-miR-7081-5p	-1.57	-1.57	N/A
Pex26	ENSMUST00000118234.2	peroxisomal biogenesis factor 26	116	Sites in UTR	3	1	1	1	1	mmu-miR-7081-5p	-1.54	-1.54	N/A
Kcna2	ENSMUST00000038695.1	potassium voltage-gated channel, shaker-related subfamily, member 2	106	Sites in UTR	4	1	1	2	1	mmu-miR-7081-5p	-1.54	-1.68	N/A
Baz1b	ENSMUST00000002825.5	bromodomain adjacent to zinc finger domain, 1B	1197	Sites in UTR	3	0	3	0	0	mmu-miR-7081-5p	-1.54	-1.54	N/A
Mlph	ENSMUST00000027528.6	melanophilin	163	Sites in UTR	39	0	38	1	1	mmu-miR-7081-5p	-1.52	-6.28	N/A
Bach2	ENSMUST00000171600.1	BTB and CNC homology 2	72	Sites in UTR	4	0	4	0	1	mmu-miR-7081-5p	-1.52	-1.67	N/A
Edc3	ENSMUST00000043990.8	enhancer of mRNA decapping 3 homolog (S. cerevisiae)	1085	Sites in UTR	4	3	0	1	0	mmu-miR-7081-5p	-1.51	-2.96	N/A
Alx4	ENSMUST00000111254.1	aristaless-like homeobox 4	37	Sites in UTR	4	2	2	0	3	mmu-miR-7081-5p	-1.5	-1.5	N/A
Tnip3	ENSMUST00000114236.1	TNFAIP3 interacting protein 3	15	Sites in UTR	3	1	1	1	1	mmu-miR-7081-5p	-1.49	-1.83	N/A
Slc12a7	ENSMUST00000017900.7	solute carrier family 12, member 7	2176	Sites in UTR	2	2	0	0	0	mmu-miR-7081-5p	-1.47	-1.93	N/A
Pea15a	ENSMUST00000013842.6	phosphoprotein enriched in astrocytes 15A	1608	Sites in UTR	4	1	2	1	2	mmu-miR-7081-5p	-1.44	-1.52	N/A
Nav2	ENSMUST00000184945.2	neuron navigator 2	536	Sites in UTR	3	1	2	0	1	mmu-miR-7081-5p	-1.44	-1.81	N/A
Pard3b	ENSMUST00000075374.4	par-3 family cell polarity regulator beta	93	Sites in UTR	2	1	1	0	1	mmu-miR-7081-5p	-1.42	-1.42	N/A
Nxf1	ENSMUST00000184970.2	nuclear RNA export factor 1	3880	Sites in UTR	3	1	2	0	1	mmu-miR-7081-5p	-1.37	-1.43	N/A
Lbh	ENSMUST00000024857.7	limb-bud and heart	1999	Sites in UTR	9	0	9	0	1	mmu-miR-7081-5p	-1.35	-1.93	N/A
Slc4a2	ENSMUST00000080067.7	solute carrier family 4 (anion exchanger), member 2	576	Sites in UTR	1	1	0	0	1	mmu-miR-7081-5p	-1.34	-1.34	N/A
Snhg11	ENSMUST00000109488.2	small nucleolar RNA host gene 11	826	Sites in UTR	5	0	5	0	2	mmu-miR-7081-5p	-1.32	-1.32	N/A
Erv3	ENSMUST00000040941.2	endogenous retroviral sequence 3	5	Sites in UTR	3	1	1	1	2	mmu-miR-7081-5p	-1.31	-1.31	N/A
Tifab	ENSMUST00000169652.1	TRAF-interacting protein with forkhead-associated domain, family member B	90	Sites in UTR	5	0	4	1	3	mmu-miR-7081-5p	-1.3	-2.57	N/A
Entpd7	ENSMUST00000081079.5	ectonucleoside triphosphate diphosphohydrolase 7	146	Sites in UTR	4	0	4	0	4	mmu-miR-7081-5p	-1.3	-2.21	N/A
Ccdc114	ENSMUST00000038720.4	coiled-coil domain containing 114	140	Sites in UTR	4	2	1	1	0	mmu-miR-7081-5p	-1.29	-2.97	N/A
C5ar1	ENSMUST00000050770.5	complement component 5a receptor 1	95	Sites in UTR	4	0	4	0	1	mmu-miR-7081-5p	-1.29	-1.31	N/A
Epb4.1l3	ENSMUST00000112680.2	erythrocyte protein band 4.1-like 3	792	Sites in UTR	2	1	0	1	0	mmu-miR-7081-5p	-1.26	-1.36	N/A
Cacng1	ENSMUST00000021065.5	calcium channel, voltage-dependent, gamma subunit 1	405	Sites in UTR	3	0	2	1	2	mmu-miR-7081-5p	-1.26	-1.51	N/A
Gdi1	ENSMUST00000015435.5	guanosine diphosphate (GDP) dissociation inhibitor 1	9	Sites in UTR	2	0	2	0	1	mmu-miR-7081-5p	-1.25	-1.25	N/A
Prl3d2	ENSMUST00000080755.5	prolactin family 3, subfamily d, member 1	5	Sites in UTR	1	1	0	0	0	mmu-miR-7081-5p	-1.25	-1.25	N/A
Evi5l	ENSMUST00000176072.2	ecotropic viral integration site 5 like	135	Sites in UTR	4	0	1	3	0	mmu-miR-7081-5p	-1.25	-1.44	N/A
Prl3d1	ENSMUST00000082079.3	prolactin family 3, subfamily d, member 1	5	Sites in UTR	1	1	0	0	0	mmu-miR-7081-5p	-1.24	-1.24	N/A
Tspan10	ENSMUST00000044105.8	tetraspanin 10	8	Sites in UTR	3	0	1	2	0	mmu-miR-7081-5p	-1.22	-1.22	N/A
Scgb1b27	ENSMUST00000085618.4	secretoglobin, family 1B, member 27	6	Sites in UTR	2	1	0	1	5	mmu-miR-7081-5p	-1.19	-2.07	N/A
Diras1	ENSMUST00000055125.4	DIRAS family, GTP-binding RAS-like 1	5	Sites in UTR	5	0	5	0	3	mmu-miR-7081-5p	-1.18	-1.18	N/A
Abcg4	ENSMUST00000034648.10	ATP-binding cassette, sub-family G (WHITE), member 4	5	Sites in UTR	6	0	6	0	1	mmu-miR-7081-5p	-1.18	-1.18	N/A
Elf5	ENSMUST00000028609.8	E74-like factor 5	82	Sites in UTR	5	0	5	0	0	mmu-miR-7081-5p	-1.17	-1.17	N/A
Map3k4	ENSMUST00000115691.2	mitogen-activated protein kinase kinase kinase 4	5	Sites in UTR	1	1	0	0	1	mmu-miR-7081-5p	-1.17	-1.17	N/A
Ccdc117	ENSMUST00000020776.4	coiled-coil domain containing 117	586	Sites in UTR	1	1	0	0	3	mmu-miR-7081-5p	-1.15	-1.17	N/A
Nkx2-1	ENSMUST00000178477.3	NK2 homeobox 1	100	Sites in UTR	7	0	6	1	3	mmu-miR-7081-5p	-1.14	-1.42	N/A
Slc41a1	ENSMUST00000086559.6	solute carrier family 41, member 1	351	Sites in UTR	2	0	2	0	2	mmu-miR-7081-5p	-1.12	-1.17	N/A
Lasp1	ENSMUST00000043843.6	LIM and SH3 protein 1	3589	Sites in UTR	6	2	3	1	0	mmu-miR-7081-5p	-1.1	-1.1	N/A
Card10	ENSMUST00000164826.2	caspase recruitment domain family, member 10	110	Sites in UTR	31	0	30	1	0	mmu-miR-7081-5p	-1.07	-1.07	N/A
Cdh5	ENSMUST00000034339.8	cadherin 5	3810	Sites in UTR	1	1	0	0	1	mmu-miR-7081-5p	-1.07	-1.07	N/A
Ntng2	ENSMUST00000177689.2	netrin G2	189	Sites in UTR	4	0	4	0	1	mmu-miR-7081-5p	-1.07	-1.11	N/A
Arf3	ENSMUST00000053183.9	ADP-ribosylation factor 3	840	Sites in UTR	6	0	5	1	2	mmu-miR-7081-5p	-1.07	-1.1	N/A
Cts8	ENSMUST00000021891.3	cathepsin 8	5	Sites in UTR	1	1	0	0	0	mmu-miR-7081-5p	-1.06	-1.06	N/A
Pdx1	ENSMUST00000085591.5	pancreatic and duodenal homeobox 1	5	Sites in UTR	2	0	2	0	2	mmu-miR-7081-5p	-1.05	-1.05	N/A
1700034O15Rik	ENSMUST00000031900.5	RIKEN cDNA 1700034O15 gene	5	Sites in UTR	2	1	1	0	0	mmu-miR-7081-5p	-1.04	-1.04	N/A
Gal3st3	ENSMUST00000061169.6	galactose-3-O-sulfotransferase 3	36	Sites in UTR	4	0	4	0	0	mmu-miR-7081-5p	-1.04	-1.04	N/A
Gypc	ENSMUST00000174459.1	glycophorin C	158	Sites in UTR	2	1	1	0	2	mmu-miR-7081-5p	-1.03	-1.56	N/A
Rtp1	ENSMUST00000038730.6	receptor transporter protein 1	5	Sites in UTR	1	1	0	0	1	mmu-miR-7081-5p	-1.03	-1.03	N/A
Pknox2	ENSMUST00000177218.2	Pbx/knotted 1 homeobox 2	270	Sites in UTR	2	0	2	0	1	mmu-miR-7081-5p	-1.02	-1.02	N/A
Prnd	ENSMUST00000110172.3	prion protein dublet	15	Sites in UTR	1	1	0	0	1	mmu-miR-7081-5p	-1.02	-1.02	N/A
Mansc1	ENSMUST00000047443.3	MANSC domain containing 1	101	Sites in UTR	10	2	7	1	1	mmu-miR-7081-5p	-1	-1.87	N/A
C920021L13Rik	ENSMUST00000120398.1	RIKEN cDNA C920021L13 gene	5	Sites in UTR	2	1	1	0	1	mmu-miR-7081-5p	-1	-1	N/A
Atp6v1f	ENSMUST00000004396.7	ATPase, H+ transporting, lysosomal V1 subunit F	4301	Sites in UTR	2	1	1	0	0	mmu-miR-7081-5p	-1	-1	N/A
Traf3	ENSMUST00000117269.2	TNF receptor-associated factor 3	465	Sites in UTR	3	0	2	1	1	mmu-miR-7081-5p	-0.99	-1.24	N/A
Lpar5	ENSMUST00000088292.5	lysophosphatidic acid receptor 5	49	Sites in UTR	3	0	2	1	1	mmu-miR-7081-5p	-0.99	-1.42	N/A
Erc1	ENSMUST00000183703.2	ELKS/RAB6-interacting/CAST family member 1	121	Sites in UTR	4	1	2	1	3	mmu-miR-7081-5p	-0.99	-1.04	N/A
Lactbl1	ENSMUST00000178843.2	lactamase, beta-like 1	9	Sites in UTR	3	0	2	1	2	mmu-miR-7081-5p	-0.99	-1.29	N/A
Twist2	ENSMUST00000007949.3	twist basic helix-loop-helix transcription factor 2	746	Sites in UTR	3	1	0	2	0	mmu-miR-7081-5p	-0.99	-0.99	N/A
Mgat5	ENSMUST00000038361.5	mannoside acetylglucosaminyltransferase 5	770	Sites in UTR	2	1	0	1	1	mmu-miR-7081-5p	-0.98	-0.99	N/A
Blmh	ENSMUST00000021197.4	bleomycin hydrolase	4639	Sites in UTR	2	0	1	1	1	mmu-miR-7081-5p	-0.97	-0.97	N/A
1810011H11Rik	ENSMUST00000039191.6	RIKEN cDNA 1810011H11 gene	59	Sites in UTR	2	1	1	0	1	mmu-miR-7081-5p	-0.97	-1.54	N/A
Tac4	ENSMUST00000021242.4	tachykinin 4	5	Sites in UTR	1	1	0	0	0	mmu-miR-7081-5p	-0.97	-0.97	N/A
Cmtm3	ENSMUST00000034343.4	CKLF-like MARVEL transmembrane domain containing 3	604	Sites in UTR	1	1	0	0	0	mmu-miR-7081-5p	-0.97	-0.97	N/A
S100z	ENSMUST00000022186.3	S100 calcium binding protein, zeta	2	Sites in UTR	4	0	4	0	0	mmu-miR-7081-5p	-0.96	-0.96	N/A
Tram2	ENSMUST00000037998.5	translocating chain-associating membrane protein 2	195	Sites in UTR	5	0	4	1	1	mmu-miR-7081-5p	-0.96	-1.07	N/A
Il2ra	ENSMUST00000028111.4	interleukin 2 receptor, alpha chain	35	Sites in UTR	4	0	4	0	2	mmu-miR-7081-5p	-0.96	-0.96	N/A
Etl4	ENSMUST00000114606.2	enhancer trap locus 4	1857	Sites in UTR	1	1	0	0	0	mmu-miR-7081-5p	-0.95	-0.96	N/A
Cpa4	ENSMUST00000049251.5	carboxypeptidase A4	5	Sites in UTR	4	1	3	0	0	mmu-miR-7081-5p	-0.95	-0.95	N/A
Pef1	ENSMUST00000118199.2	penta-EF hand domain containing 1	2843	Sites in UTR	2	0	1	1	0	mmu-miR-7081-5p	-0.95	-0.95	N/A
Fhl1	ENSMUST00000114769.3	four and a half LIM domains 1	16936	Sites in UTR	1	1	0	0	0	mmu-miR-7081-5p	-0.95	-0.95	N/A
Scnn1a	ENSMUST00000081440.8	sodium channel, nonvoltage-gated 1 alpha	2942	Sites in UTR	2	0	1	1	0	mmu-miR-7081-5p	-0.94	-0.95	N/A
Igf2	ENSMUST00000000033.6	insulin-like growth factor 2	20	Sites in UTR	2	0	1	1	1	mmu-miR-7081-5p	-0.94	-0.94	N/A
Lingo1	ENSMUST00000053568.1	leucine rich repeat and Ig domain containing 1	21	Sites in UTR	4	1	3	0	2	mmu-miR-7081-5p	-0.94	-1.1	N/A
Rimkla	ENSMUST00000049994.7	ribosomal modification protein rimK-like family member A	22	Sites in UTR	1	1	0	0	1	mmu-miR-7081-5p	-0.94	-0.94	N/A
Wasf2	ENSMUST00000084241.6	WAS protein family, member 2	4077	Sites in UTR	2	2	0	0	0	mmu-miR-7081-5p	-0.93	-0.94	N/A
Ppp1r12b	ENSMUST00000045665.7	protein phosphatase 1, regulatory (inhibitor) subunit 12B	2779	Sites in UTR	5	1	2	2	4	mmu-miR-7081-5p	-0.93	-0.94	N/A
Mcu	ENSMUST00000020312.7	mitochondrial calcium uniporter	1548	Sites in UTR	2	0	2	0	0	mmu-miR-7081-5p	-0.92	-0.93	N/A
Rnf141	ENSMUST00000177236.2	ring finger protein 141	3667	Sites in UTR	1	1	0	0	0	mmu-miR-7081-5p	-0.92	-0.93	N/A
Arl8a	ENSMUST00000027684.5	ADP-ribosylation factor-like 8A	1254	Sites in UTR	3	1	1	1	0	mmu-miR-7081-5p	-0.91	-0.91	N/A
Chrnb3	ENSMUST00000079463.5	cholinergic receptor, nicotinic, beta polypeptide 3	5	Sites in UTR	2	0	1	1	2	mmu-miR-7081-5p	-0.91	-0.91	N/A
Pitpnb	ENSMUST00000086635.4	phosphatidylinositol transfer protein, beta	1119	Sites in UTR	5	1	4	0	0	mmu-miR-7081-5p	-0.9	-3.05	N/A
Fzd7	ENSMUST00000114246.3	frizzled homolog 7 (Drosophila)	197	Sites in UTR	7	0	7	0	1	mmu-miR-7081-5p	-0.9	-3.18	N/A
BC068281	ENSMUST00000085793.2	cDNA sequence BC068281	107	Sites in UTR	2	0	2	0	1	mmu-miR-7081-5p	-0.89	-0.94	N/A
Ern1	ENSMUST00000001059.3	endoplasmic reticulum (ER) to nucleus signalling 1	832	Sites in UTR	2	0	1	1	2	mmu-miR-7081-5p	-0.89	-0.94	N/A
Grin2b	ENSMUST00000053880.7	glutamate receptor, ionotropic, NMDA2B (epsilon 2)	5	Sites in UTR	7	0	2	5	2	mmu-miR-7081-5p	-0.89	-0.89	N/A
Scn4a	ENSMUST00000021056.7	sodium channel, voltage-gated, type IV, alpha	2232	Sites in UTR	2	0	1	1	1	mmu-miR-7081-5p	-0.89	-1	N/A
Cry2	ENSMUST00000090559.6	cryptochrome 2 (photolyase-like)	566	Sites in UTR	2	0	2	0	0	mmu-miR-7081-5p	-0.88	-0.89	N/A
A730017C20Rik	ENSMUST00000165666.3	RIKEN cDNA A730017C20 gene	5	Sites in UTR	3	0	3	0	1	mmu-miR-7081-5p	-0.88	-0.88	N/A
Gca	ENSMUST00000028257.2	grancalcin	910	Sites in UTR	4	0	4	0	0	mmu-miR-7081-5p	-0.88	-1	N/A
Lrrc14b	ENSMUST00000022064.4	leucine rich repeat containing 14B	240	Sites in UTR	2	1	1	0	0	mmu-miR-7081-5p	-0.87	-1.43	N/A
Cd74	ENSMUST00000050487.9	CD74 antigen (invariant polypeptide of major histocompatibility complex, class II antigen-associated)	5890	Sites in UTR	3	1	1	1	0	mmu-miR-7081-5p	-0.87	-0.87	N/A
Kirrel	ENSMUST00000159976.2	kin of IRRE like (Drosophila)	961	Sites in UTR	4	2	2	0	3	mmu-miR-7081-5p	-0.86	-0.89	N/A
Ypel4	ENSMUST00000090729.3	yippee-like 4 (Drosophila)	7	Sites in UTR	3	1	2	0	0	mmu-miR-7081-5p	-0.86	-0.86	N/A
Gm16515	ENSMUST00000019075.3	predicted gene, Gm16515	258	Sites in UTR	3	0	1	2	2	mmu-miR-7081-5p	-0.85	-0.87	N/A
Gcnt2	ENSMUST00000110191.3	glucosaminyl (N-acetyl) transferase 2, I-branching enzyme	49	Sites in UTR	1	1	0	0	0	mmu-miR-7081-5p	-0.85	-0.88	N/A
Mknk2	ENSMUST00000003433.6	MAP kinase-interacting serine/threonine kinase 2	387	Sites in UTR	3	0	2	1	0	mmu-miR-7081-5p	-0.84	-1.07	N/A
Gm5878	ENSMUST00000113802.3	predicted gene 5878	5	Sites in UTR	1	0	1	0	3	mmu-miR-7081-5p	-0.84	-0.84	N/A
Prdm11	ENSMUST00000111274.2	PR domain containing 11	40	Sites in UTR	12	2	3	7	2	mmu-miR-7081-5p	-0.84	-1.04	N/A
1700012B07Rik	ENSMUST00000106674.2	RIKEN cDNA 1700012B07 gene	5	Sites in UTR	3	2	1	0	0	mmu-miR-7081-5p	-0.84	-0.84	N/A
Lrrc63	ENSMUST00000022574.4	leucine rich repeat containing 63	5	Sites in UTR	2	2	0	0	0	mmu-miR-7081-5p	-0.84	-0.84	N/A
Col4a4	ENSMUST00000087050.6	collagen, type IV, alpha 4	472	Sites in UTR	7	0	7	0	1	mmu-miR-7081-5p	-0.83	-0.84	N/A
Hnf4g	ENSMUST00000017832.9	hepatocyte nuclear factor 4, gamma	34	Sites in UTR	1	1	0	0	0	mmu-miR-7081-5p	-0.83	-0.86	N/A
A630081J09Rik	ENSMUST00000179412.1	RIKEN cDNA A630081J09 gene	5	Sites in UTR	4	0	2	2	3	mmu-miR-7081-5p	-0.83	-0.83	N/A
G6pd2	ENSMUST00000053876.3	glucose-6-phosphate dehydrogenase 2	154	Sites in UTR	3	1	1	1	0	mmu-miR-7081-5p	-0.82	-0.82	N/A
Cnnm1	ENSMUST00000165311.1	cyclin M1	20	Sites in UTR	1	1	0	0	0	mmu-miR-7081-5p	-0.82	-0.82	N/A
Zc3h12b	ENSMUST00000082183.7	zinc finger CCCH-type containing 12B	40	Sites in UTR	1	1	0	0	2	mmu-miR-7081-5p	-0.82	-1.11	N/A
Zfp275	ENSMUST00000114499.2	zinc finger protein 275	848	Sites in UTR	1	0	1	0	3	mmu-miR-7081-5p	-0.82	-0.83	N/A
Galm	ENSMUST00000039205.5	galactose mutarotase	674	Sites in UTR	2	0	1	1	0	mmu-miR-7081-5p	-0.82	-0.84	N/A
Sec14l5	ENSMUST00000165810.1	SEC14-like 5 (S. cerevisiae)	346	Sites in UTR	1	1	0	0	1	mmu-miR-7081-5p	-0.82	-0.83	N/A
4933440M02Rik	ENSMUST00000061823.1	RIKEN cDNA 4933440M02 gene	5	Sites in UTR	4	1	3	0	0	mmu-miR-7081-5p	-0.82	-0.82	N/A
Gm8186	ENSMUST00000053575.3	predicted gene 8186	5	Sites in UTR	1	1	0	0	0	mmu-miR-7081-5p	-0.81	-0.81	N/A
Cit	ENSMUST00000051704.9	citron	7	Sites in UTR	2	1	1	0	4	mmu-miR-7081-5p	-0.81	-0.84	N/A
Otub2	ENSMUST00000179684.1	OTU domain, ubiquitin aldehyde binding 2	41	Sites in UTR	2	0	2	0	0	mmu-miR-7081-5p	-0.81	-0.95	N/A
Gm6970	ENSMUST00000169692.1	predicted gene 6970	5	Sites in UTR	2	0	1	1	1	mmu-miR-7081-5p	-0.8	-0.8	N/A
Olfr1029	ENSMUST00000082191.3	olfactory receptor 1029	11	Sites in UTR	1	1	0	0	1	mmu-miR-7081-5p	-0.8	-1.1	N/A
Uqcrh	ENSMUST00000050580.5	ubiquinol-cytochrome c reductase hinge protein	89	Sites in UTR	1	1	0	0	0	mmu-miR-7081-5p	-0.8	-0.8	N/A
Target gene	Representative transcript	Gene name	Number of 3P-seq tags supporting UTR + 5	Link to sites in UTRs	Site counts				6mer sites	Representative miRNA	Cumulative weighted context++ score	Total context++ score	Aggregate PCT
					total	8mer	7mer-m8	7mer-A1
Anp32b	ENSMUST00000102926.4	acidic (leucine-rich) nuclear phosphoprotein 32 family, member B	16234	Sites in UTR	1	1	0	0	0	mmu-miR-5122	-0.94	-0.94	N/A
Gm9913	ENSMUST00000066157.1	predicted gene 9913	9	Sites in UTR	1	1	0	0	0	mmu-miR-5122	-0.93	-0.93	N/A
Oaf	ENSMUST00000034512.5	OAF homolog (Drosophila)	4152	Sites in UTR	1	1	0	0	0	mmu-miR-5122	-0.89	-0.89	N/A
Slc22a2	ENSMUST00000046959.7	solute carrier family 22 (organic cation transporter), member 2	56	Sites in UTR	1	1	0	0	0	mmu-miR-5122	-0.87	-0.87	N/A
Pou4f3	ENSMUST00000025374.3	POU domain, class 4, transcription factor 3	5	Sites in UTR	1	1	0	0	0	mmu-miR-5122	-0.86	-0.86	N/A
1810011O10Rik	ENSMUST00000052622.5	RIKEN cDNA 1810011O10 gene	174	Sites in UTR	1	1	0	0	0	mmu-miR-5122	-0.85	-0.85	N/A
Tmem145	ENSMUST00000108409.1	transmembrane protein 145	15	Sites in UTR	2	0	2	0	1	mmu-miR-5122	-0.84	-0.84	N/A
Gm10545	ENSMUST00000097612.2	predicted gene 10545	5	Sites in UTR	2	0	2	0	1	mmu-miR-5122	-0.81	-0.81	N/A
Target gene	Representative transcript	Gene name	Number of 3P-seq tags supporting UTR + 5	Link to sites in UTRs	Site counts				6mer sites	Representative miRNA	Cumulative weighted context++ score	Total context++ score	Aggregate PCT
					total	8mer	7mer-m8	7mer-A1
Sec14l5	ENSMUST00000165810.1	SEC14-like 5 (S. cerevisiae)	346	Sites in UTR	2	1	1	0	0	mmu-miR-1946a	-1.63	-1.67	N/A
Spi1	ENSMUST00000002180.7	spleen focus forming virus (SFFV) proviral integration oncogene	340	Sites in UTR	3	0	3	0	0	mmu-miR-1946a	-1.08	-1.08	N/A
Pard3b	ENSMUST00000075374.4	par-3 family cell polarity regulator beta	93	Sites in UTR	1	1	0	0	0	mmu-miR-1946a	-1.05	-1.05	N/A
Crhr2	ENSMUST00000003568.9	corticotropin releasing hormone receptor 2	27	Sites in UTR	1	1	0	0	0	mmu-miR-1946a	-0.98	-0.98	N/A
C2cd4d	ENSMUST00000169433.1	C2 calcium-dependent domain containing 4D	19	Sites in UTR	1	1	0	0	0	mmu-miR-1946a	-0.97	-0.97	N/A
Rgs8	ENSMUST00000041776.6	regulator of G-protein signaling 8	5	Sites in UTR	1	1	0	0	1	mmu-miR-1946a	-0.92	-0.92	N/A
Ikzf4	ENSMUST00000133342.2	IKAROS family zinc finger 4	87	Sites in UTR	3	1	1	1	0	mmu-miR-1946a	-0.88	-0.88	N/A
Kdelc2	ENSMUST00000037853.3	KDEL (Lys-Asp-Glu-Leu) containing 2	463	Sites in UTR	1	1	0	0	0	mmu-miR-1946a	-0.88	-1.23	N/A
Otp	ENSMUST00000022195.11	orthopedia homolog (Drosophila)	6	Sites in UTR	3	1	2	0	3	mmu-miR-1946a	-0.87	-0.99	N/A
Rab11fip4	ENSMUST00000017783.7	RAB11 family interacting protein 4 (class II)	123	Sites in UTR	1	1	0	0	0	mmu-miR-1946a	-0.83	-0.93	N/A
Target gene	Representative transcript	Gene name	Number of 3P-seq tags supporting UTR + 5	Link to sites in UTRs	Site counts				6mer sites	Representative miRNA	Cumulative weighted context++ score	Total context++ score	Aggregate PCT
					total	8mer	7mer-m8	7mer-A1
Ankrd45	ENSMUST00000111608.2	ankyrin repeat domain 45	57	Sites in UTR	10	10	0	0	1	mmu-miR-6982-5p	-3.3	-3.44	N/A
Slc12a7	ENSMUST00000017900.7	solute carrier family 12, member 7	2176	Sites in UTR	2	2	0	0	0	mmu-miR-6982-5p	-1.78	-1.96	N/A
Fzd7	ENSMUST00000114246.3	frizzled homolog 7 (Drosophila)	197	Sites in UTR	2	1	1	0	2	mmu-miR-6982-5p	-1.66	-1.8	N/A
Gm2007	ENSMUST00000178133.2	predicted gene 2007	0	Sites in UTR	4	0	1	3	3	mmu-miR-6982-5p	-1.64	-1.64	N/A
Gm11007	ENSMUST00000178120.2	predicted gene 11007	0	Sites in UTR	4	0	1	3	3	mmu-miR-6982-5p	-1.64	-1.64	N/A
Pate2	ENSMUST00000118254.1	prostate and testis expressed 2	10	Sites in UTR	2	1	1	0	0	mmu-miR-6982-5p	-1.57	-1.69	N/A
Trav7n-6	ENSMUST00000178100.1	T cell receptor alpha variable 7N-6	5	Sites in UTR	2	1	1	0	0	mmu-miR-6982-5p	-1.56	-1.56	N/A
Card10	ENSMUST00000164826.2	caspase recruitment domain family, member 10	110	Sites in UTR	30	0	30	0	3	mmu-miR-6982-5p	-1.51	-1.52	N/A
Mlph	ENSMUST00000027528.6	melanophilin	163	Sites in UTR	4	0	3	1	1	mmu-miR-6982-5p	-1.5	-2.16	N/A
Palm2Akap2	ENSMUST00000150412.1	Palm2-Akap2 readthrough transcript	3643	Sites in UTR	4	0	3	1	0	mmu-miR-6982-5p	-1.47	-1.57	N/A
Pim3	ENSMUST00000042818.9	proviral integration site 3	12270	Sites in UTR	2	1	0	1	1	mmu-miR-6982-5p	-1.45	-1.45	N/A
Pard3b	ENSMUST00000075374.4	par-3 family cell polarity regulator beta	93	Sites in UTR	4	0	1	3	0	mmu-miR-6982-5p	-1.45	-1.45	N/A
Sbk3	ENSMUST00000144863.2	SH3 domain binding kinase family, member 3	10	Sites in UTR	5	0	5	0	1	mmu-miR-6982-5p	-1.41	-1.41	N/A
Glp1r	ENSMUST00000114574.1	glucagon-like peptide 1 receptor	60	Sites in UTR	4	1	1	2	3	mmu-miR-6982-5p	-1.4	-2.47	N/A
RP24-324D14.2	ENSMUST00000187738.1		5	Sites in UTR	3	0	2	1	3	mmu-miR-6982-5p	-1.38	-1.38	N/A
Aifm3	ENSMUST00000115685.2	apoptosis-inducing factor, mitochondrion-associated 3	34	Sites in UTR	1	1	0	0	2	mmu-miR-6982-5p	-1.35	-1.35	N/A
Entpd7	ENSMUST00000081079.5	ectonucleoside triphosphate diphosphohydrolase 7	146	Sites in UTR	5	1	3	1	0	mmu-miR-6982-5p	-1.29	-2.99	N/A
Peg10	ENSMUST00000176204.2	paternally expressed 10	1687	Sites in UTR	4	0	3	1	8	mmu-miR-6982-5p	-1.23	-1.24	N/A
Crxos	ENSMUST00000150050.2	cone-rod homeobox, opposite strand	5	Sites in UTR	1	1	0	0	1	mmu-miR-6982-5p	-1.21	-1.21	N/A
Best3	ENSMUST00000020378.4	bestrophin 3	174	Sites in UTR	1	0	1	0	1	mmu-miR-6982-5p	-1.17	-1.73	N/A
F930017D23Rik	ENSMUST00000099888.2	RIKEN cDNA F930017D23 gene	5	Sites in UTR	4	0	3	1	1	mmu-miR-6982-5p	-1.17	-1.17	N/A
Slc41a1	ENSMUST00000086559.6	solute carrier family 41, member 1	351	Sites in UTR	2	1	0	1	1	mmu-miR-6982-5p	-1.15	-1.24	N/A
Pygo1	ENSMUST00000038489.5	pygopus 1	359	Sites in UTR	2	1	1	0	2	mmu-miR-6982-5p	-1.14	-1.22	N/A
Nprl3	ENSMUST00000020530.6	nitrogen permease regulator-like 3	369	Sites in UTR	1	1	0	0	0	mmu-miR-6982-5p	-1.11	-1.12	N/A
Cts8	ENSMUST00000021891.3	cathepsin 8	5	Sites in UTR	1	1	0	0	0	mmu-miR-6982-5p	-1.11	-1.11	N/A
Usp27x	ENSMUST00000191497.1	ubiquitin specific peptidase 27, X chromosome	22	Sites in UTR	1	1	0	0	0	mmu-miR-6982-5p	-1.08	-1.08	N/A
Tcl1b2	ENSMUST00000081379.6	T cell leukemia/lymphoma 1B, 2	5	Sites in UTR	2	0	2	0	0	mmu-miR-6982-5p	-1.07	-1.07	N/A
Abtb2	ENSMUST00000076212.3	ankyrin repeat and BTB (POZ) domain containing 2	378	Sites in UTR	2	1	0	1	2	mmu-miR-6982-5p	-1.07	-1.51	N/A
Chrnb3	ENSMUST00000079463.5	cholinergic receptor, nicotinic, beta polypeptide 3	5	Sites in UTR	2	0	2	0	2	mmu-miR-6982-5p	-1.06	-1.06	N/A
Tax1bp1	ENSMUST00000080723.5	Tax1 (human T cell leukemia virus type I) binding protein 1	2622	Sites in UTR	3	0	3	0	1	mmu-miR-6982-5p	-1.06	-1.63	N/A
Ltb4r2	ENSMUST00000044554.4	leukotriene B4 receptor 2	38	Sites in UTR	1	1	0	0	0	mmu-miR-6982-5p	-1.04	-1.29	N/A
Zfp174	ENSMUST00000041778.7	zinc finger protein 174	81	Sites in UTR	2	1	1	0	3	mmu-miR-6982-5p	-1.04	-1.64	N/A
Gm9994	ENSMUST00000178757.2	predicted gene 9994	5	Sites in UTR	1	1	0	0	0	mmu-miR-6982-5p	-1.04	-1.04	N/A
Ccdc125	ENSMUST00000170347.2	coiled-coil domain containing 125	78	Sites in UTR	2	2	0	0	1	mmu-miR-6982-5p	-1.03	-1.27	N/A
Plekhg1	ENSMUST00000120274.2	pleckstrin homology domain containing, family G (with RhoGef domain) member 1	302	Sites in UTR	1	1	0	0	1	mmu-miR-6982-5p	-1.03	-1.04	N/A
Gramd2	ENSMUST00000128944.2	GRAM domain containing 2	136	Sites in UTR	30	12	18	0	0	mmu-miR-6982-5p	-1.03	-5.62	N/A
Lrrc59	ENSMUST00000021239.6	leucine rich repeat containing 59	13744	Sites in UTR	1	1	0	0	0	mmu-miR-6982-5p	-1.03	-1.05	N/A
Gdpd4	ENSMUST00000041860.7	glycerophosphodiester phosphodiesterase domain containing 4	5	Sites in UTR	2	0	1	1	0	mmu-miR-6982-5p	-1.02	-1.02	N/A
Gstt3	ENSMUST00000001715.4	glutathione S-transferase, theta 3	94	Sites in UTR	1	1	0	0	0	mmu-miR-6982-5p	-1.02	-1.12	N/A
Unc93b1	ENSMUST00000165711.1	unc-93 homolog B1 (C. elegans)	1257	Sites in UTR	1	1	0	0	0	mmu-miR-6982-5p	-1	-1	N/A
Hhat	ENSMUST00000044190.6	hedgehog acyltransferase	15	Sites in UTR	1	0	0	1	5	mmu-miR-6982-5p	-0.99	-0.99	N/A
Vldlr	ENSMUST00000167487.2	very low density lipoprotein receptor	1825	Sites in UTR	2	1	0	1	1	mmu-miR-6982-5p	-0.99	-1.25	N/A
Fbxw8	ENSMUST00000049474.7	F-box and WD-40 domain protein 8	1748	Sites in UTR	3	0	1	2	2	mmu-miR-6982-5p	-0.98	-1.56	N/A
Bach2	ENSMUST00000171600.1	BTB and CNC homology 2	72	Sites in UTR	2	0	1	1	2	mmu-miR-6982-5p	-0.97	-1.11	N/A
Nav2	ENSMUST00000184945.2	neuron navigator 2	536	Sites in UTR	1	0	1	0	3	mmu-miR-6982-5p	-0.95	-1.01	N/A
Mfap5	ENSMUST00000121656.1	microfibrillar associated protein 5	724	Sites in UTR	2	1	0	1	1	mmu-miR-6982-5p	-0.95	-1.03	N/A
Syn1	ENSMUST00000115345.2	synapsin I	74	Sites in UTR	4	1	1	2	2	mmu-miR-6982-5p	-0.95	-0.96	N/A
Kdf1	ENSMUST00000121797.1	keratinocyte differentiation factor 1	148	Sites in UTR	1	1	0	0	0	mmu-miR-6982-5p	-0.95	-0.96	N/A
Atp6v0e2	ENSMUST00000040361.5	ATPase, H+ transporting, lysosomal V0 subunit E2	563	Sites in UTR	2	0	2	0	3	mmu-miR-6982-5p	-0.94	-1.07	N/A
Gm9925	ENSMUST00000066583.1	predicted gene 9925	7	Sites in UTR	2	2	0	0	1	mmu-miR-6982-5p	-0.93	-0.93	N/A
Sept1	ENSMUST00000106314.2	septin 1	46	Sites in UTR	2	1	0	1	0	mmu-miR-6982-5p	-0.92	-0.95	N/A
Nhsl2	ENSMUST00000101339.5	NHS-like 2	124	Sites in UTR	5	1	3	1	3	mmu-miR-6982-5p	-0.9	-0.94	N/A
Flt4	ENSMUST00000020617.2	FMS-like tyrosine kinase 4	354	Sites in UTR	1	0	1	0	3	mmu-miR-6982-5p	-0.89	-1	N/A
Alg9	ENSMUST00000034561.5	asparagine-linked glycosylation 9 (alpha 1,2 mannosyltransferase)	877	Sites in UTR	1	1	0	0	0	mmu-miR-6982-5p	-0.89	-0.89	N/A
Gm14305	ENSMUST00000108981.3	predicted gene 14305	0	Sites in UTR	4	0	1	3	3	mmu-miR-6982-5p	-0.88	-0.88	N/A
3830406C13Rik	ENSMUST00000112669.4	RIKEN cDNA 3830406C13 gene	1195	Sites in UTR	3	3	0	0	3	mmu-miR-6982-5p	-0.88	-3.22	N/A
Msmp	ENSMUST00000107884.2	microseminoprotein, prostate associated	13	Sites in UTR	1	1	0	0	0	mmu-miR-6982-5p	-0.88	-0.88	N/A
Efcab8	ENSMUST00000175856.1	EF-hand calcium binding domain 8	15	Sites in UTR	2	0	1	1	0	mmu-miR-6982-5p	-0.87	-0.87	N/A
Stk32b	ENSMUST00000094836.4	serine/threonine kinase 32B	7	Sites in UTR	1	1	0	0	0	mmu-miR-6982-5p	-0.87	-0.87	N/A
Hist1h4n	ENSMUST00000102979.1	histone cluster 1, H4n	5	Sites in UTR	1	1	0	0	0	mmu-miR-6982-5p	-0.87	-0.87	N/A
Gm10083	ENSMUST00000074466.5	predicted gene 10083	11	Sites in UTR	1	1	0	0	1	mmu-miR-6982-5p	-0.87	-0.97	N/A
Stk36	ENSMUST00000087183.5	serine/threonine kinase 36	44	Sites in UTR	2	0	1	1	1	mmu-miR-6982-5p	-0.86	-1.05	N/A
Sypl2	ENSMUST00000029486.8	synaptophysin-like 2	3244	Sites in UTR	2	1	1	0	4	mmu-miR-6982-5p	-0.86	-0.98	N/A
Gpr114	ENSMUST00000166802.2	G protein-coupled receptor 114	21	Sites in UTR	2	0	2	0	1	mmu-miR-6982-5p	-0.85	-0.85	N/A
Cntnap5c	ENSMUST00000076038.5	contactin associated protein-like 5C	0	Sites in UTR	2	0	2	0	0	mmu-miR-6982-5p	-0.84	-0.84	N/A
Nkiras2	ENSMUST00000017981.4	NFKB inhibitor interacting Ras-like protein 2	400	Sites in UTR	2	0	1	1	0	mmu-miR-6982-5p	-0.83	-0.87	N/A
Exog	ENSMUST00000035094.7	endo/exonuclease (5'-3'), endonuclease G-like	204	Sites in UTR	2	2	0	0	3	mmu-miR-6982-5p	-0.83	-0.87	N/A
Mob3a	ENSMUST00000003438.9	MOB kinase activator 3A	224	Sites in UTR	3	0	1	2	1	mmu-miR-6982-5p	-0.82	-1.25	N/A
Bsph2	ENSMUST00000108526.2	binder of sperm protein homolog 2	5	Sites in UTR	1	1	0	0	0	mmu-miR-6982-5p	-0.82	-0.82	N/A
Sfmbt2	ENSMUST00000041105.6	Scm-like with four mbt domains 2	19	Sites in UTR	2	0	2	0	2	mmu-miR-6982-5p	-0.82	-0.82	N/A
Hdac11	ENSMUST00000041736.5	histone deacetylase 11	663	Sites in UTR	2	0	1	1	1	mmu-miR-6982-5p	-0.82	-0.82	N/A
Sh2d1a	ENSMUST00000189753.1	SH2 domain protein 1A	5	Sites in UTR	2	1	0	1	0	mmu-miR-6982-5p	-0.81	-0.81	N/A
AI118078	ENSMUST00000085754.4	expressed sequence AI118078	37	Sites in UTR	2	0	2	0	1	mmu-miR-6982-5p	-0.81	-0.81	N/A
Gm14410	ENSMUST00000133301.2	predicted gene 14410	0	Sites in UTR	4	1	0	3	1	mmu-miR-6982-5p	-0.81	-0.81	N/A
Gm6169	ENSMUST00000071118.4	predicted gene 6169	5	Sites in UTR	2	1	1	0	0	mmu-miR-6982-5p	-0.81	-0.81	N/A
Gm6710	ENSMUST00000109012.3	predicted gene 6710	0	Sites in UTR	4	0	1	3	3	mmu-miR-6982-5p	-0.81	-0.81	N/A
Grk5	ENSMUST00000003313.8	G protein-coupled receptor kinase 5	357	Sites in UTR	5	1	2	2	0	mmu-miR-6982-5p	-0.81	-1.34	N/A
Plp2	ENSMUST00000033486.5	proteolipid protein 2	20	Sites in UTR	2	1	1	0	0	mmu-miR-6982-5p	-0.81	-0.81	N/A
Rapgef5	ENSMUST00000109691.2	Rap guanine nucleotide exchange factor (GEF) 5	1442	Sites in UTR	4	1	0	3	1	mmu-miR-6982-5p	-0.81	-0.83	N/A
Trpm3	ENSMUST00000037901.7	transient receptor potential cation channel, subfamily M, member 3	21	Sites in UTR	2	0	1	1	0	mmu-miR-6982-5p	-0.81	-0.81	N/A
Gm14434	ENSMUST00000122097.3	predicted gene 14434	0	Sites in UTR	4	0	1	3	3	mmu-miR-6982-5p	-0.8	-0.8	N/A
Gm4724	ENSMUST00000109045.3	predicted gene 4724	0	Sites in UTR	4	0	1	3	3	mmu-miR-6982-5p	-0.8	-0.8	N/A
Zswim5	ENSMUST00000044823.3	zinc finger SWIM-type containing 5	194	Sites in UTR	1	1	0	0	1	mmu-miR-6982-5p	-0.8	-1.11	N/A
Target gene	Representative transcript	Gene name	Number of 3P-seq tags supporting UTR + 5	Link to sites in UTRs	Site counts				6mer sites	Representative miRNA	Cumulative weighted context++ score	Total context++ score	Aggregate PCT
					total	8mer	7mer-m8	7mer-A1
Hist1h2bj	ENSMUST00000110452.1	histone cluster 1, H2bj	31	Sites in UTR	2	2	0	0	4	mmu-miR-7044-5p	-1.36	-1.87	N/A
Gm136	ENSMUST00000095129.2	predicted gene 136	5	Sites in UTR	1	1	0	0	0	mmu-miR-7044-5p	-1.36	-1.36	N/A
Gm10309	ENSMUST00000095186.2	predicted gene 10309	7	Sites in UTR	3	0	2	1	1	mmu-miR-7044-5p	-1.31	-1.31	N/A
RP23-293C19.2	ENSMUST00000187455.1		5	Sites in UTR	4	1	3	0	0	mmu-miR-7044-5p	-1.31	-1.31	N/A
Drg1	ENSMUST00000020741.6	developmentally regulated GTP binding protein 1	973	Sites in UTR	3	1	0	2	2	mmu-miR-7044-5p	-1.28	-2.04	N/A
Cypt2	ENSMUST00000041758.4	cysteine-rich perinuclear theca 2	5	Sites in UTR	1	1	0	0	0	mmu-miR-7044-5p	-1.28	-1.28	N/A
RP23-133G16.2	ENSMUST00000191265.1		5	Sites in UTR	5	1	4	0	1	mmu-miR-7044-5p	-1.26	-1.26	N/A
Erg	ENSMUST00000113846.4	avian erythroblastosis virus E-26 (v-ets) oncogene related	581	Sites in UTR	3	0	2	1	1	mmu-miR-7044-5p	-1.2	-1.2	N/A
Zfp398	ENSMUST00000114598.1	zinc finger protein 398	264	Sites in UTR	4	1	1	2	1	mmu-miR-7044-5p	-1.17	-1.73	N/A
Sema6a	ENSMUST00000019791.8	sema domain, transmembrane domain (TM), and cytoplasmic domain, (semaphorin) 6A	613	Sites in UTR	6	0	6	0	1	mmu-miR-7044-5p	-1.13	-1.13	N/A
Ltbp2	ENSMUST00000002073.7	latent transforming growth factor beta binding protein 2	28	Sites in UTR	2	1	1	0	1	mmu-miR-7044-5p	-1.09	-1.28	N/A
Ak7	ENSMUST00000040876.5	adenylate kinase 7	44	Sites in UTR	1	1	0	0	0	mmu-miR-7044-5p	-1.03	-1.07	N/A
Reep6	ENSMUST00000105354.2	receptor accessory protein 6	3207	Sites in UTR	4	1	0	3	1	mmu-miR-7044-5p	-1.01	-1.01	N/A
Serpina5	ENSMUST00000021495.3	serine (or cysteine) peptidase inhibitor, clade A, member 5	8	Sites in UTR	1	1	0	0	0	mmu-miR-7044-5p	-1	-1	N/A
Oxnad1	ENSMUST00000022462.8	oxidoreductase NAD-binding domain containing 1	905	Sites in UTR	1*	0	0	0	3	mmu-miR-7044-5p	-1	0	N/A
Prkaa2	ENSMUST00000030243.7	protein kinase, AMP-activated, alpha 2 catalytic subunit	2924	Sites in UTR	1*	0	0	0	4	mmu-miR-7044-5p	-1	0	N/A
Mpeg1	ENSMUST00000081035.7	macrophage expressed gene 1	977	Sites in UTR	1	1	0	0	1	mmu-miR-7044-5p	-0.99	-0.99	N/A
Zfp616	ENSMUST00000178159.1	zinc finger protein 616	0	Sites in UTR	2	0	2	0	1	mmu-miR-7044-5p	-0.98	-0.98	N/A
Gm2007	ENSMUST00000178133.2	predicted gene 2007	0	Sites in UTR	3	0	3	0	3	mmu-miR-7044-5p	-0.95	-0.95	N/A
Gm11007	ENSMUST00000178120.2	predicted gene 11007	0	Sites in UTR	3	0	3	0	3	mmu-miR-7044-5p	-0.95	-0.95	N/A
Vmn2r30	ENSMUST00000174368.2	vomeronasal 2, receptor 30	5	Sites in UTR	1	1	0	0	0	mmu-miR-7044-5p	-0.94	-0.94	N/A
Cntnap5a	ENSMUST00000043725.8	contactin associated protein-like 5A	21	Sites in UTR	3	1	1	1	0	mmu-miR-7044-5p	-0.89	-1.33	N/A
Plag1	ENSMUST00000003369.4	pleiomorphic adenoma gene 1	77	Sites in UTR	2	0	2	0	1	mmu-miR-7044-5p	-0.89	-0.93	N/A
Crxos	ENSMUST00000150050.2	cone-rod homeobox, opposite strand	5	Sites in UTR	2	0	1	1	1	mmu-miR-7044-5p	-0.86	-0.86	N/A
Glp1r	ENSMUST00000114574.1	glucagon-like peptide 1 receptor	60	Sites in UTR	4	0	3	1	2	mmu-miR-7044-5p	-0.84	-1.55	N/A
Pard3b	ENSMUST00000075374.4	par-3 family cell polarity regulator beta	93	Sites in UTR	2	0	1	1	2	mmu-miR-7044-5p	-0.84	-0.84	N/A
Cypt12	ENSMUST00000029080.3	cysteine-rich perinuclear theca 12	5	Sites in UTR	1	1	0	0	0	mmu-miR-7044-5p	-0.81	-0.81	N/A
